# Supplementary material for: Investigation of the Antifungal and Anti-Aflatoxigenic Potential of Plant-Based Essential Oils against Aspergillus flavus in Peanuts
Source: J Fungi (Basel). 2020 Dec 21;6(4):383. doi: 10.3390/jof6040383 (PMC7767372; doi:10.3390/jof6040383)
Supplement: Supplementary file 1 [file jof-06-00383-s001.pdf]

# Supplementary Materials: Investigation of the Antifungal and Anti-Aflatoxigenic Potential of Plant-Based Essential Oils against *Aspergillus flavus* in Peanuts

**Table 1.** (a) Raw data used to generate the calibration equation shown in Figure S1 below; Stock reference standard was 1 µg/mL Aflatoxin B1 (Sigma Aldrich, St. Louis, MO, USA). (b) Raw data for sample analysis. Control = not Clove Oil treated. Column four was calculated based on the calibration equation above.

| (a)      |             |          |            |
|----------|-------------|----------|------------|
| Solution | µL Standard | ppm AFB1 | Area Count |
| 1        | 100         | 10       | 1972962    |
| 2        | 200         | 20       | 3257785    |
| 3        | 400         | 40       | 6744612    |
| 4        | 500         | 50       | 8717443    |

  

| (b)      |               |            |            |
|----------|---------------|------------|------------|
| Sample   | ppm Clove Oil | Area Count | ppm/g AFB1 |
| Control  | 0             | 6237366    | 29.97      |
| Oil_500  | 500           | 5506910    | 26.18      |
| Oil_1000 | 1000          | 4493832    | 21.00      |
| Oil_1500 | 1500          | 3254477    | 19.64      |
| Oil_2000 | 2000          | 3494229    | 10.64      |
| Oil_2500 | 2500          | 4714857    | 12.50      |

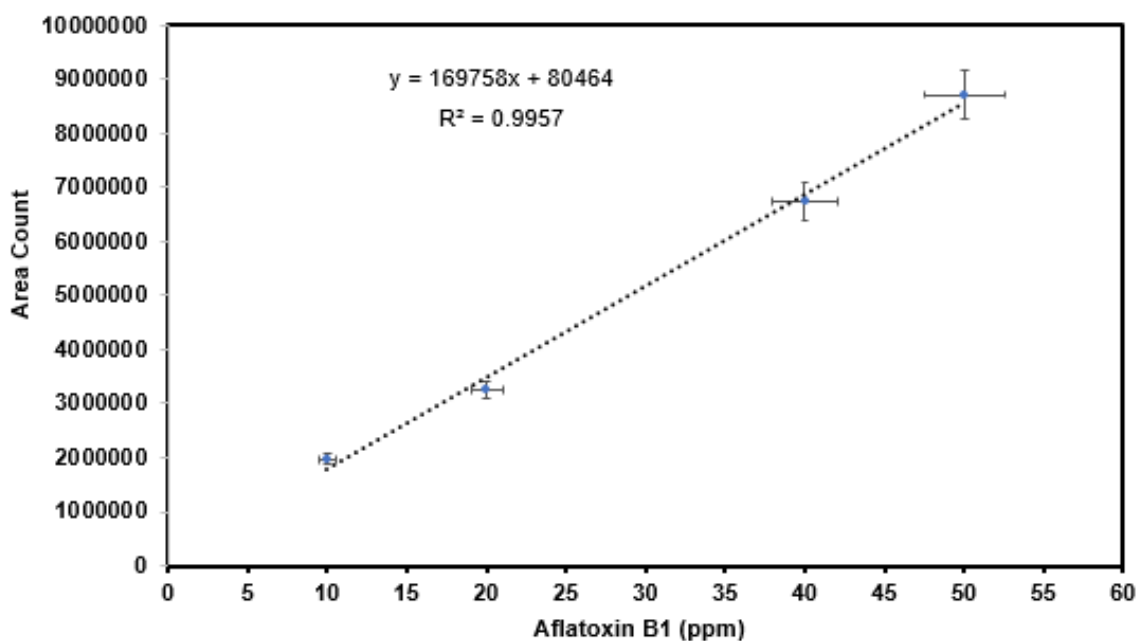

**Figure S1.** Calibration equation generated by linear regression from Table S1 data.
